# Supplementary material for: Gulf war illness-related chemicals increase CD11b/c+ monocyte infiltration into the liver and aggravate hepatic cholestasis in a rodent model
Source: PubMed Central journal article supplement (PMC6120951; doi:10.1038/s41598-018-31599-9), 2018-09-03
Supplement: 41598_2018_31599_MOESM1_ESM.pdf [file 41598_2018_31599_MOESM1_ESM.pdf]

# **Gulf war illness-related chemicals increase CD11b/c<sup>+</sup> monocyte infiltration into the liver and aggravate hepatic cholestasis in a rodent model**

Supplementary information

Anca D. Petrescu <sup>[1,2]</sup>, Stephanie Grant <sup>[1,2]</sup>, Gabriel Frampton <sup>[1,2]</sup>, Matthew McMillin <sup>[2]</sup>, Jessica Kain <sup>[1]</sup>, Maheedhar Kodali <sup>[2,3]</sup>, Ashok K. Shetty <sup>[2,3]</sup>, Sharon DeMorrow <sup>[1,2]\*</sup>

<sup>[1]</sup> Department of Medical Physiology, Texas A&M College of Medicine, Temple, 76504, USA

<sup>[2]</sup> Central Texas Veterans Healthcare System, Temple 76504, USA

<sup>[3]</sup> Institute for Regenerative Medicine, Department of Molecular and Cellular Medicine, Texas A&M College of Medicine, College Station, 77843, USA

<sup>[\*]</sup> [demorrow@medicine.tamhsc.edu](mailto:demorrow@medicine.tamhsc.edu)

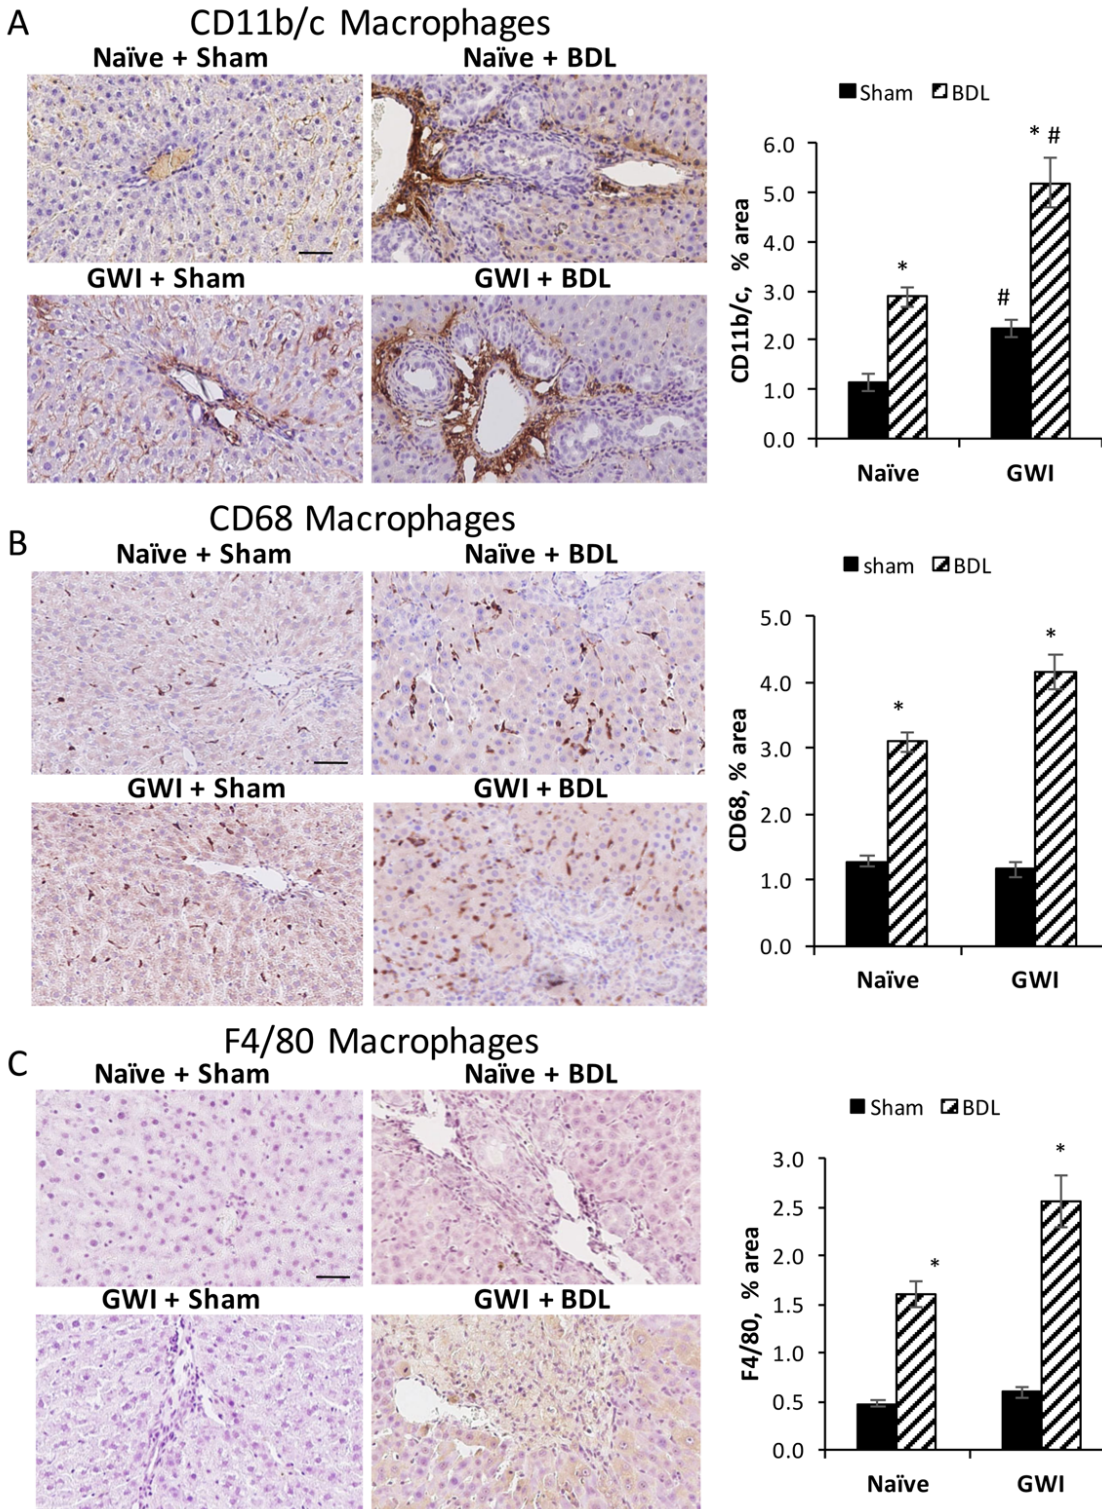

**Supplementary Figure 1.** IHC pictures and quantifications of CD11b/c<sup>+</sup> (panel A), CD68<sup>+</sup> (panel B) and F4/80<sup>+</sup> (panel C) macrophages in the livers of naïve and GWI rats subjected to sham or BDL surgery.  $p < 0.05$ . \* BDL vs Sham; #, GWI vs Naïve. Scale bar, 100 $\mu$ M.

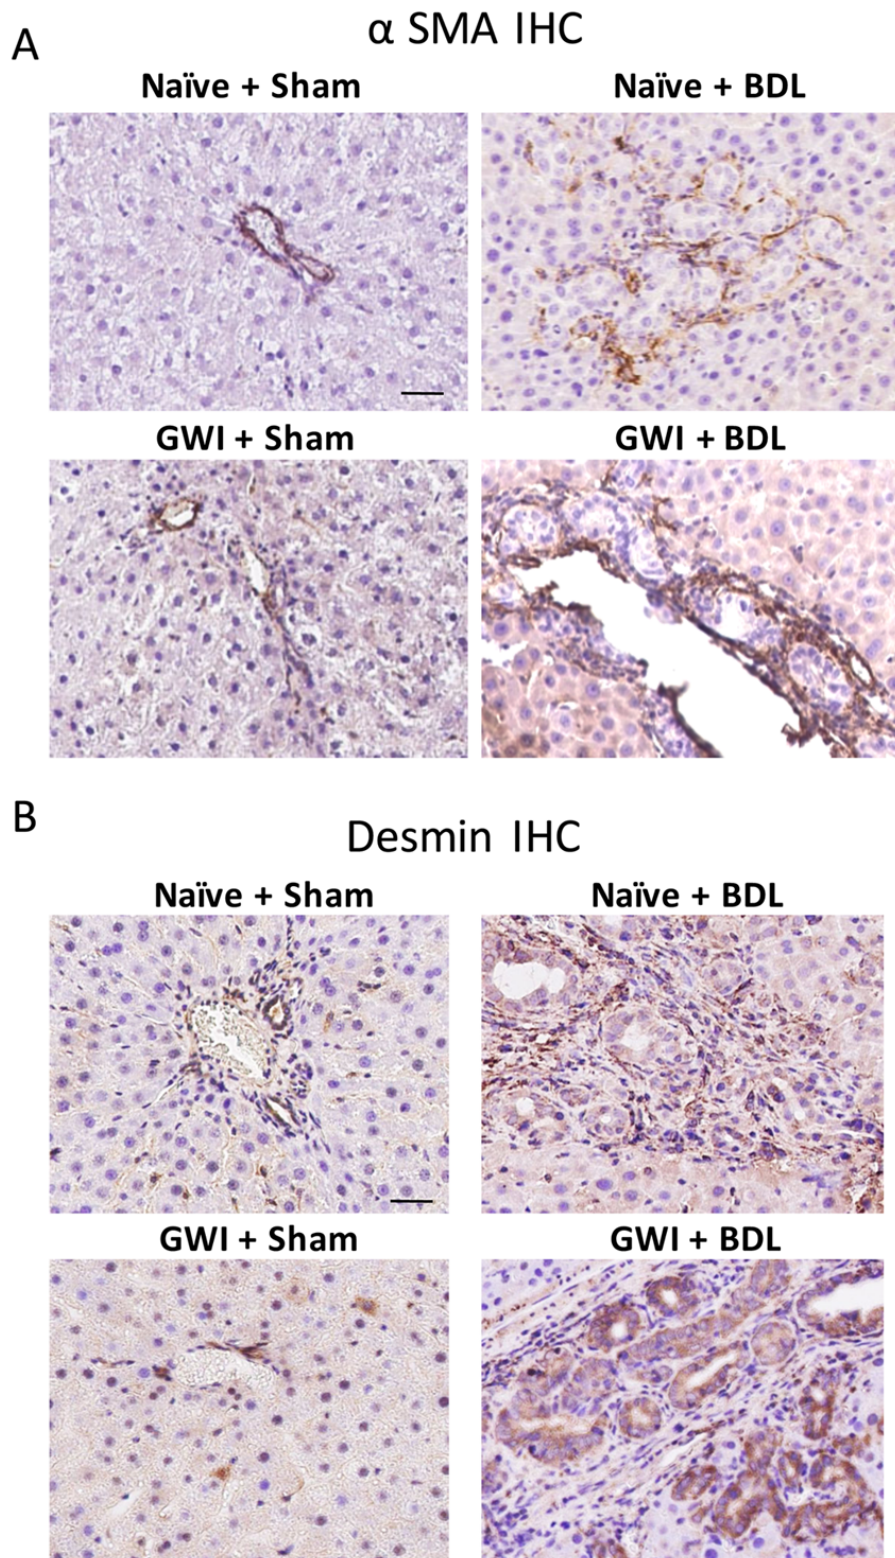

**Supplementary Figure 2.** Representative images of IHC of  $\alpha$ SMA (panel A) and desmin (B) in the livers of naïve and GWI rats subjected to sham or BDL surgeries. Scale bar, 100 $\mu$ M.
